# Supplementary material
Source: MDPI journal article supplement (https://www.mdpi.com/2075-4701/9/10/1065)
Supplement: s1 [file s1]

# An in vivo Evaluation of Biocompatibility and Implant Accuracy of the Electron Beam Melting and Commercial Reconstruction Plates

Khaja Moiduddin <sup>1,\*</sup>, Syed Hammad Mian <sup>1</sup>, Mohammed Alkindi <sup>2</sup>, Sundar Ramalingam <sup>2</sup>, Hisham Alkhalefah <sup>1</sup> and Osama Alghamdi <sup>2</sup>

<sup>1</sup> Advanced Manufacturing Institute, King Saud University, Riyadh 11421, Saudi Arabia; syedhammad68@yahoo.co.in (S.H.M.); halkhalefah@ksu.edu.sa (H.A.)

<sup>2</sup> Department of Oral and Maxillofacial Surgery, College of Dentistry, King Saud University, Riyadh 11545, Saudi Arabia; malkindi@ksu.edu.sa (M.A.); smunusamy@ksu.edu.sa (S.R.); oghamdi@ksu.edu.sa (O.A.)

\* Correspondence: kmoiduddin@gmail.com or khussain1@ksu.edu.sa; Tel.: 096-611-469-7372

Received: 2 September 2019; Accepted: 26 September 2019; Published: date

**Table ST1.** Implant cost calculation spreadsheet for Electron beam melting.

| Cost Distribution Factors       | Variables                                      | Cost and Time Period | Summary                                                                         |
|---------------------------------|------------------------------------------------|----------------------|---------------------------------------------------------------------------------|
|                                 | EBM Machine price                              | \$700,000            | -                                                                               |
|                                 | Machine depreciation period                    | 10 years             | -                                                                               |
|                                 | Annual depreciation                            | \$70,000/year        | -                                                                               |
|                                 | Basic EBM machine maintenance and service cost | \$36000/year         | -                                                                               |
|                                 | Annual ownership cost                          | 106,000              | Annual ownership cost = (yearly depreciation + yearly maintenance)              |
|                                 | Effective working days (per year)              | 300 days             | -                                                                               |
|                                 | Ownership cost (per day)                       | \$353                | Ownership cost per day = (Annual ownership/effective working days)              |
|                                 | EBM Ownership cost (per hour)                  | \$15                 | \$353/24                                                                        |
|                                 | EBM consumables cost (per hour)                | \$14                 | Reference [ST2]                                                                 |
|                                 | $C_{Indirect}$                                 | \$29                 | Total indirect cost = ( EBM ownership cost (\$15) + EBM consumable cost (\$14)) |
| Total build time<br>$T_{Build}$ | Time to obtain desired vacuum level            | 0.5 h                | -                                                                               |

|                                                           |                                                            |                                |                                                                                                                                                                                  |
|-----------------------------------------------------------|------------------------------------------------------------|--------------------------------|----------------------------------------------------------------------------------------------------------------------------------------------------------------------------------|
|                                                           | Time to heat start plate                                   | 0.5 h                          | -                                                                                                                                                                                |
|                                                           | EBM cool down time                                         | 3 h                            | -                                                                                                                                                                                |
|                                                           | Build time for 5 implants with mesh                        | 8 h                            | Total built time for 5 plates= [EBM built time (4 h) + preheating (1 h) time + cooling time (3 h)]                                                                               |
|                                                           | Build time for 5 plates without mesh                       | 7 h                            | Total built time for 5 plates = [EBM built time (3 h) + preheating (1 h) time + cooling time (3 h)]                                                                              |
| $(C_{Indirect} \times T_{Build})$ 5 implants with mesh    | For 5 implants with mesh                                   | (\$29/h $\times$ 8 h)<br>\$232 | -                                                                                                                                                                                |
| $(C_{Indirect} \times T_{Build})$ 5 Implants without mesh | For 5 implants without mesh                                | (\$29/h $\times$ 7 h)<br>\$203 | -                                                                                                                                                                                |
| $W_{mesh\ plates}$<br>(Weight of plates)                  | Weight of 5 Plates with mesh                               | 28.15 g                        | Weight of a single plate with mesh = 5.63 g                                                                                                                                      |
|                                                           | Weight of 5 Plates without mesh                            | 18.95 g                        | Weight of a single plate without mesh = 3.79 g                                                                                                                                   |
| $C_{Raw}$<br>(EBM raw material price)                     | $C_{Raw}$ (Ti6Al4V ELI cost price)                         | \$0.22/g                       | = \$220/kg                                                                                                                                                                       |
| $(W_{mesh\ Plate} \times C_{Raw})$                        | For 5 plates with mesh                                     | \$6.19                         | (28.15 g $\times$ \$ 0.22/g)                                                                                                                                                     |
| $(W_{without\ mesh\ plate} \times C_{Raw})$               | For 5 plates without mesh                                  | \$4.16                         | (18.95 g $\times$ \$ 0.22/g)                                                                                                                                                     |
| EBM energy consumption<br>$E_{Build}$                     | EBM Power supply                                           | 7 KW [33]                      |                                                                                                                                                                                  |
|                                                           | $E_{Build}$ (Energy consumption for 5 plates with mesh)    | 56 KWh                         | Energy consumption for 5 plates = (EBM power consumption $\times$ total EBM built time for 5 plates)<br>= 7 KW $\times$ 8 h                                                      |
|                                                           | $E_{Build}$ (Energy consumption for 5 plates without mesh) | 49 KWh                         | = 7 KW $\times$ 7 h                                                                                                                                                              |
| EBM Electricity Cost<br>$C_{Energy}$                      | $C_{Energy}$ (EBM energy consumption cost)                 | \$0.085/KWh                    | Electricity tariff = Sar 0.32/KWh<br>( <a href="https://www.se.com.sa/en-us/customers/Pages/TariffRates.aspx">https://www.se.com.sa/en-us/customers/Pages/TariffRates.aspx</a> ) |
| $(E_{Build} \times C_{Energy})$                           | For 5 plates with mesh                                     | \$4.76                         | (56 KWh $\times$ \$ 0.085/KWh)                                                                                                                                                   |
| $(E_{Build} \times C_{Energy})$                           | For 5 plates without mesh                                  | \$4.16                         | (49 KWh $\times$ \$ 0.085/KWh)                                                                                                                                                   |
| Manual Hours<br>$M_{Hours}$                               | Pre-fabrication time                                       | 2 h                            | Prefabrication includes the time for preparing and processing DICOM files.                                                                                                       |

|                                    |                                            |                            |                                                                                          |
|------------------------------------|--------------------------------------------|----------------------------|------------------------------------------------------------------------------------------|
|                                    | EBM fabrication time                       | 1.0 h                      | EBM fabrication time consist of time taken in setting up EBM machine and post operation. |
|                                    | $M_{Hours}$ (Total Manual hours)           | 3.0 h                      | Total manual hours = (Prefabrication time + fabrication time)                            |
| Labor cost<br>$C_{Labour}$         | $C_{Labour}$ (Labor cost for manual labor) | \$5.33/h                   | -                                                                                        |
| $(M_{Hours} \times C_{Labour})$    | For 5 plates with and without mesh         | \$16.00                    | $(3.0 \text{ h} \times \$ 5.33/\text{h})$                                                |
| Cost Model for plates with mesh    | For 5 plates with mesh                     | \$259                      | $\$232 + \$6.19 + \$4.76 + \$16.00$                                                      |
|                                    | For single plate with mesh                 | \$52                       | $\$259/5$                                                                                |
| Cost Model for plates without mesh | For 5 plates without mesh                  | \$228                      | $\$203 + \$4.169 + \$4.16 + \$16.00$                                                     |
|                                    | For single plate without mesh              | \$46                       | $\$228/5$                                                                                |
| Commercial available Single Plate  |                                            | Reference [28] \$250–\$330 |                                                                                          |

Table ST2. Price calculation of major EBM spare parts (Consumables).

| Parts                               | Price (\$) | Maintenance Cycle (h) | Cost/h (\$) |
|-------------------------------------|------------|-----------------------|-------------|
| Start Plate (150 mm × 150 mm) (1pc) | 78         | 400                   | 0.20        |
| Filament F120 (1pc)                 | 1060       | 100                   | 10.6        |
| Rake blades Long 370 (1pc)          | 11         | 100                   | 0.11        |
| Thermocouple 1.5 m                  | 35         | 100                   | 0.35        |
| Ground ring protection foil (1pc)   | 45         | 200                   | 0.22        |
| Heatshield body tall (1pc)          | 303        | 300                   | 1.01        |
| Miscellaneous Items                 |            | -                     | 1.5         |
| Total Consumable costs              |            |                       | 14.0        |

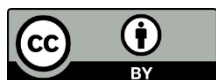

© 2019 by the authors. Submitted for possible open access publication under the terms and conditions of the Creative Commons Attribution (CC BY) license (<http://creativecommons.org/licenses/by/4.0/>).
